# Supplementary material for: Nanocrystalline cellulose-based mixed ionic–electronic conductor for bioelectronics
Source: Royal Society of Chemistry journal article supplement (doi:10.1039/d4tc03264k), 2024-01-01
Supplement: d4tc03264k1.pdf [file d4tc03264k1.pdf]

## **Nanocrystalline cellulose-based mixed ionic-electronic conductor for bioelectronics**

Katharina Matura,<sup>a</sup> Rosarita D'Orsi,<sup>b</sup> Laura Spagnuolo,<sup>b</sup> Felix Mayr,<sup>a</sup> Munise Cobet,<sup>a</sup> Christoph Putz,<sup>c</sup> Alessandra Operamolla,<sup>b</sup> Serpil Tekoglu<sup>a\*</sup>

<sup>a</sup>*Linz Institute for Solar Cells (LIOS) and Institute of Physical Chemistry, Johannes Kepler University Linz, Altenberger Str. 69, A-4040, Linz, Austria*

<sup>b</sup>*Department of Chemistry and Industrial Chemistry, University of Pisa, Via Giuseppe Moruzzi 13, I-56124, Pisa, Italy*

<sup>c</sup>*Division of Soft Matter Physics and Institute of Experimental Physics, Johannes Kepler University Linz, Altenberger Str. 69, A-4040, Austria*

\*Corresponding author: [serpil.tekoglu@jku.at](mailto:serpil.tekoglu@jku.at)

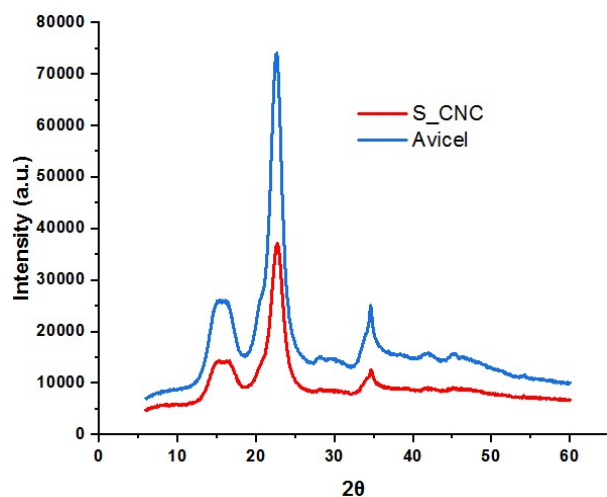

**Figure S1.** X-ray diffraction (XRD) analysis of the sulphated cellulose nanocrystals (S-CNCs) and microcrystalline cellulose, MCC (Avicel). In red: S-CNCs, in blue: Avicel PH-101.

**Table S1.** Crystallinity Index and elemental analysis of pristine Avicel PH-101 and sulphated cellulose Nanocrystals obtained from Avicel PH-101.

| Entry | Sample | Crystallinity Index <sup>1</sup> / % | Elemental Analysis |      |      |      |                |
|-------|--------|--------------------------------------|--------------------|------|------|------|----------------|
|       |        |                                      | C                  | H    | N    | S    | O <sup>2</sup> |
| 1     | Avicel | 80                                   | 43.09              | 6.55 | -    | -    | 50.58          |
| 2     | S-CNCs | 75                                   | 40.11              | 6.55 | 0.00 | 0.60 | 52.73          |

<sup>1</sup> Oxygen was calculated by subtracting from 100 C, H, N, and S.

<sup>2</sup>Crystallinity values are evaluated by Segal method  $CrI = [(I_{200} - I_{am}) / I_{200} \times 100]$

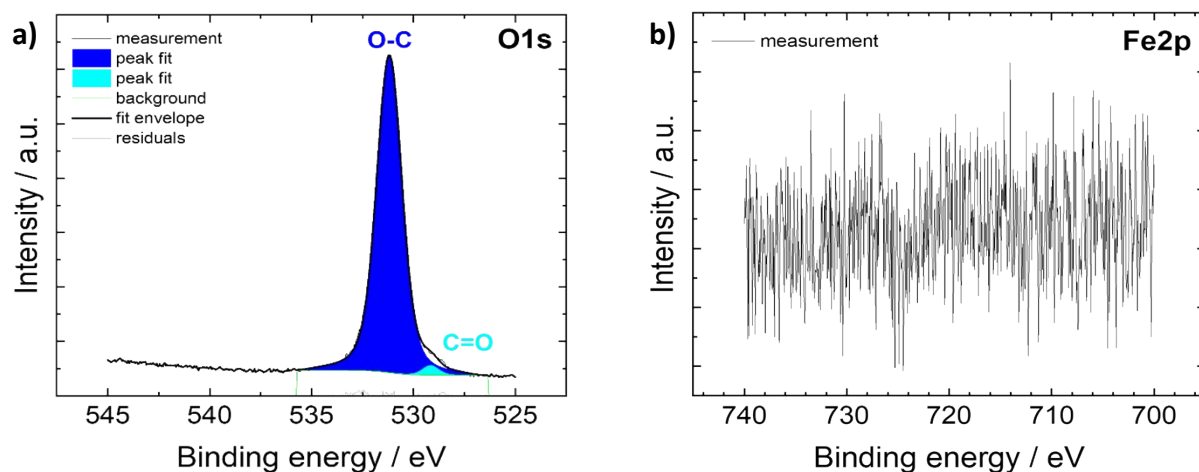

**Figure S2.** XPS spectrum of PEDOT:S-CNCs. Peak deconvolution for the (a) O1s and (b) Fe2p signals

**Table S2.** Elemental analysis PEDOT:S-CNCs with the calculation of C, O, and S ratios and elemental analysis A complete elemental analysis with the calculation of C, O, and S ratios.

|     | Energy / eV | FWHM / 1 | Amplitude / 1 | Atom percentage / % |
|-----|-------------|----------|---------------|---------------------|
| S2p | 162.38      | 1.92     | 11046.98      | 5.68                |
| O1s | 531.07      | 2.65     | 91910.82      | 36.47               |
| C1s | 284.66      | 3.08     | 56945.2       | 57.85               |

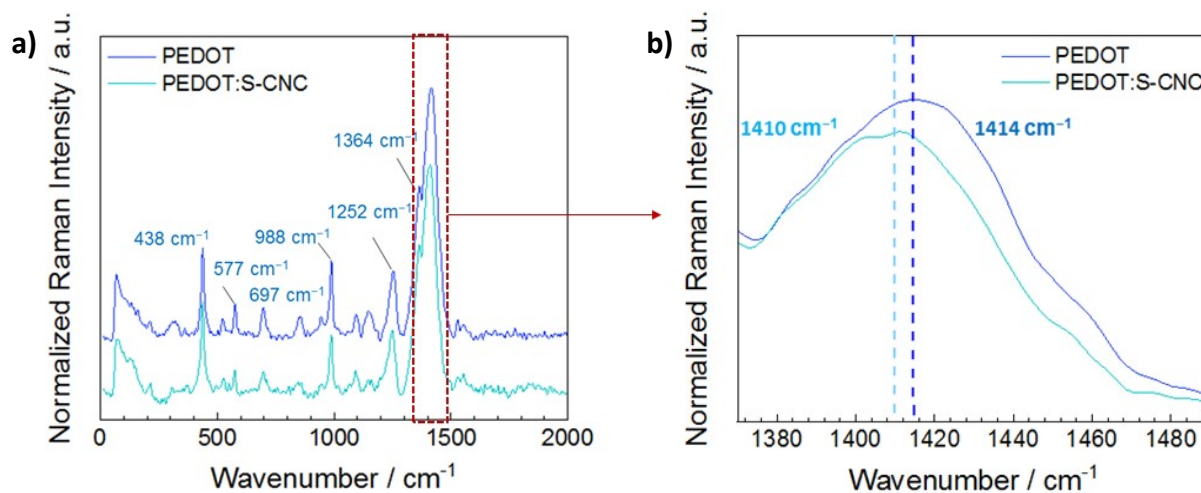

**Figure S3.** (a) Raman spectra of pristine PEDOT and the PEDOT:S-CNC biocomposite, recorded using an excitation wavelength of 1064 nm and a resolution of 4 cm<sup>-1</sup>. The shown spectra are the average of 1000 scans. (b) Enlarged picture of the peak shift of 4 cm<sup>-1</sup>.

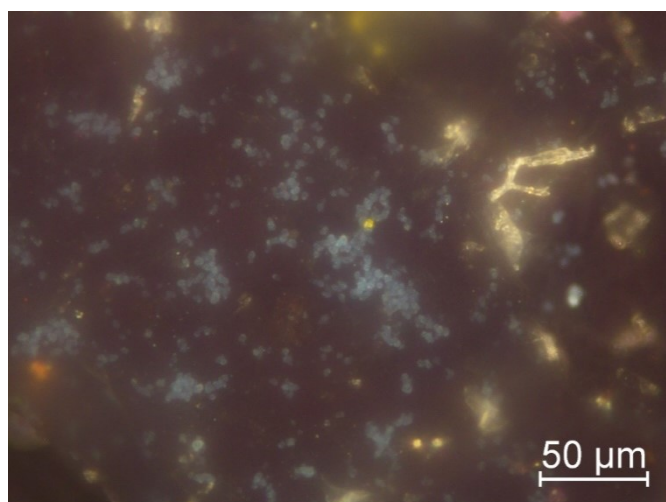

**Figure S4.** Optical appearance of S-CNCs aggregates on glass when imaged through polarization filter (recorded in reflective mode).

**Table S3.** Conductivity and synthesis conditions of PEDOT:S-CNCs in comparison to literature values and commercial PEDOT:PSS (Clevios PH 1000).

| Sample Material                                       | SO <sub>3</sub> H / 100 glucose units | Mass ratio EDOT:CNC | Oxidant            | EDOT: Oxidant molar ratio | Conductivity / S cm <sup>-1</sup> |
|-------------------------------------------------------|---------------------------------------|---------------------|--------------------|---------------------------|-----------------------------------|
| PEDOT:S-CNC + A <sup>a</sup>                          | 5                                     | 1:1                 | FeTos <sup>1</sup> | 1:2.5                     | 5 ± 1                             |
| PEDOT:S-CNC-SO <sub>3</sub> H + A <sup>b</sup>        | 3.50                                  | 1:2.5               | APS <sup>2</sup>   | 1:1                       | 1.26 ± 0.13                       |
| PEDOT:S-CNC-[high]-SO <sub>3</sub> H + A <sup>b</sup> | 37.23                                 | 1:2.5               | APS                | 1:1                       | 25.6 ± 0.72                       |
| PEDOT:PSS + A <sup>a</sup>                            | -                                     | -                   | -                  | -                         | 2800                              |

<sup>a</sup> Dispersion was prepared with the additives (A) 0.5% (v/v) DBSA, 10% (v/v) Glycerol and an additional 1% (v/v) of GOPS. The statistics for the conductivity values were performed on n = 11 thin film substrates (all in the range of approx. 140-270 nm), whereby the used value for each thin film is an average value calculated including three individual thickness and resistance measurements on each thin film.

<sup>b</sup> Dispersion from literature reference <sup>1</sup> was prepared with 5% (v/v) DMSO.

<sup>1</sup>FeTos: Iron (III) tosylate, <sup>2</sup>APS: Ammonium persulfate

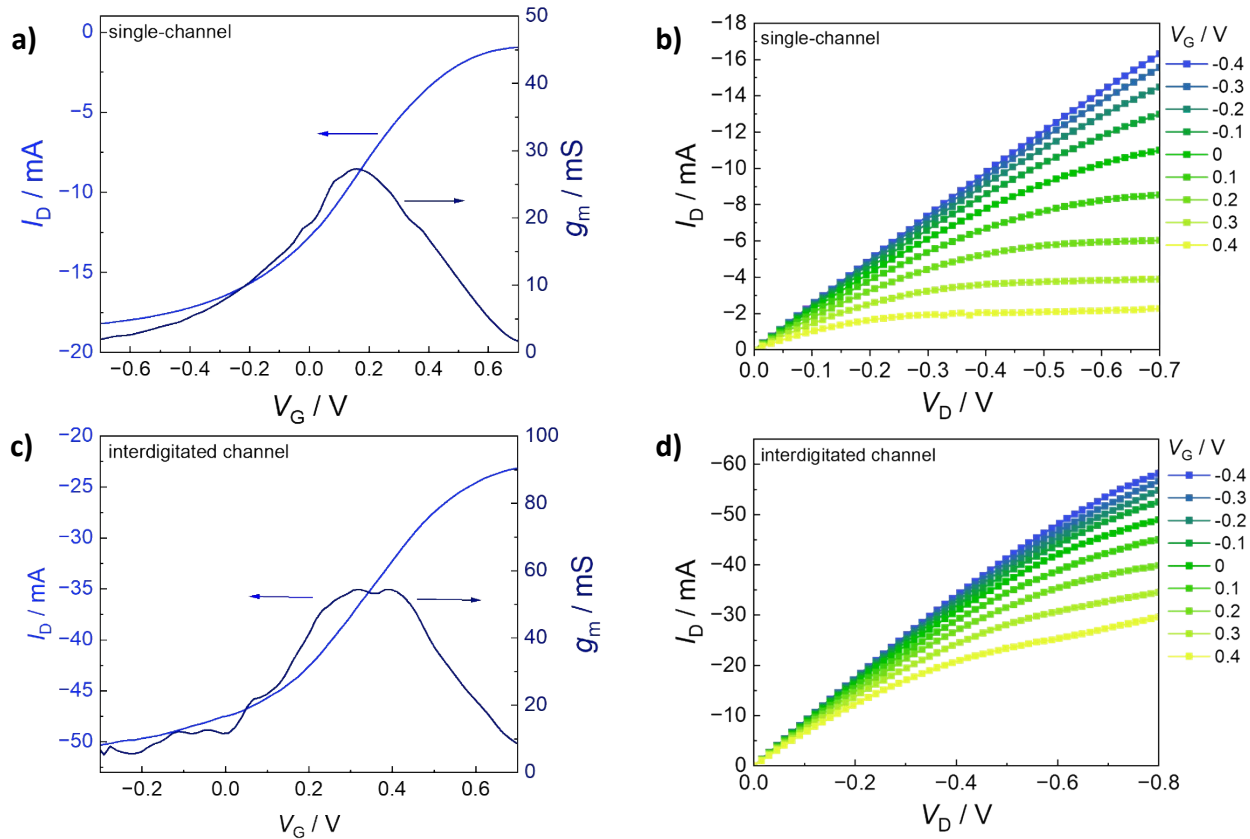

**Figure S5.** Steady-state electrical characterization of PEDOT:PSS (Clevios PH 1000) based OECTs. (a) Transfer characteristics and the corresponding transconductance curve ( $g_{\text{max}} = 27.3 \text{ mS}$  for  $V_D = -0.7 \text{ V}$ ) and (b) the corresponding output characteristics for a single-channel OECT device ( $W = 2.11 \text{ mm}$ ,  $L = 48.1 \text{ }\mu\text{m}$ , film thickness =  $260 \text{ nm}$ ). (c) Transfer characteristics and transconductance ( $g_{\text{max}} = 54.4 \text{ mS}$  for  $V_D = -0.7 \text{ V}$ ) and (d) the corresponding output characteristics for an interdigitated OECT device (dimensions of one source-drain electrode pair:  $W = 0.54 \text{ }\mu\text{m}$ ,  $L = 44.9 \text{ }\mu\text{m}$ , film thickness =  $265 \text{ nm}$ ).

## References

- 1 S. Atifi, M.-N. Mirvakili and W. Y. Hamad, *ACS Appl. Polym. Mater.*, 2022, **4**, 5626–5637.
